# Supplementary material for: Oleic Acid Uptake Reveals the Rescued Enterocyte Phenotype of Colon Cancer Caco-2 by HT29-MTX Cells in Co-Culture Mode
Source: MDPI journal article supplement (doi:10.3390/ijms18071573), 2017-07-20
Supplement: s1 [file s1]

Table S1: List of fatty acid regulatable genes related to human intestinal phenotype.

| UNIQID           | Name                                                                   | GeneID  | Cancer Biomarker | Caco Diff vs Undiff | Caco vs HT29 Diff | Caco diff vs entero ileal + jejunal | Colonocyte | Enterocyte |
|------------------|------------------------------------------------------------------------|---------|------------------|---------------------|-------------------|-------------------------------------|------------|------------|
| ACLY             | ATP citrate lyase                                                      | 47      | x                |                     |                   | x                                   |            |            |
| ACOX1            | acyl-Coenzyme A oxidase 1, palmitoyl                                   | 119     |                  |                     |                   | x                                   |            |            |
| ADFP (PLIN2)     | perilipin-2                                                            | 131395  |                  | x                   |                   |                                     |            |            |
| ADIPOR2          | adiponectin receptor 2                                                 | 79602   |                  |                     |                   | x                                   |            |            |
| AFP              | alpha-fetoprotein                                                      | 174     |                  | x                   | x                 | x                                   |            |            |
| APOA2            | apolipoprotein A-II                                                    | 336     |                  | x                   | x                 | x                                   |            |            |
| APOC3            | apolipoprotein C-III                                                   | 345     |                  | x                   | x                 | x                                   |            |            |
| ATF3             | activating transcription factor 3                                      | 467     |                  | x                   | x                 | x                                   |            |            |
| BHLHB2 (BHLHE40) | basic helix-loop-helix family, member e40                              | 6280356 |                  |                     |                   | x                                   |            |            |
| CD36             | CD36 molecule (thrombospondin receptor)                                | 948     | x                |                     |                   | x                                   |            | x          |
| CEBPA            | CCAAT/enhancer binding protein (C/EBP), alpha                          | 1050    |                  |                     |                   | x                                   |            |            |
| CLDN4            | claudin 4                                                              | 1364    |                  |                     |                   | x                                   |            |            |
| CYP1A1           | cytochrome P450, family 1, subfamily A, polypeptide 1                  | 1543    |                  | x                   | x                 |                                     |            |            |
| ESR1             | estrogen receptor 1                                                    | 2099    | x                | x                   |                   |                                     |            |            |
| FABP1            | fatty acid binding protein 1, liver                                    | 2168    | x                | x                   | x                 |                                     |            |            |
| FABP2            | fatty acid binding protein 2, intestinal                               | 2169    |                  | x                   |                   | x                                   |            |            |
| FABP3            | fatty acid binding protein 3, muscle and heart                         | 2170    |                  | x                   | x                 |                                     |            |            |
| FABP4 (AP2)      | fatty acid binding protein 4, adipocyte                                | 2167    | x                | x                   |                   |                                     |            |            |
| FABP5            | fatty acid binding protein 5 (psoriasis-associated)                    | 2171    | x                |                     |                   | x                                   |            |            |
| FASN             | fatty acid synthase                                                    | 2194    | x                | x                   |                   | x                                   |            |            |
| FN1              | fibronectin 1                                                          | 2335    | x                | x                   | x                 | x                                   |            |            |
| G0S2             | G0/G1 switch 2                                                         | 50486   |                  |                     |                   | x                                   |            |            |
| GADD45a          | growth arrest and DNA-damage-inducible, alpha                          | 1647    | x                | x                   |                   |                                     | x          |            |
| ID1              | inhibitor of DNA binding 1, dominant negative helix-loop-helix protein | 3397    | x                |                     | x                 |                                     |            |            |
| ID2              | inhibitor of DNA binding 2, dominant negative helix-loop-helix protein | 3398    | x                |                     | x                 | x                                   |            |            |

|                |                                                                     |        |   |   |   |   |   |   |
|----------------|---------------------------------------------------------------------|--------|---|---|---|---|---|---|
| IDI1           | isopentenyl-diphosphate delta isomerase 1                           | 3422   |   |   |   |   |   |   |
| INSIG1         | insulin induced gene 1                                              | 3638   |   | x |   | x |   |   |
| IRS1           | insulin receptor substrate 1                                        | 3667   |   |   |   | x |   |   |
| LDHA           | lactate dehydrogenase A                                             | 3939   | x |   |   | x |   |   |
| LDLR           | low density lipoprotein receptor                                    | 3949   |   |   |   | x |   |   |
| LEP            | leptin                                                              | 3952   | x |   |   |   | x | x |
| LIPC           | lipase, hepatic                                                     | 3990   |   |   | x | x |   |   |
| MUC3A          | mucin 3A, cell surface associated                                   | 4584   |   |   |   | x |   |   |
| NFE2L2 (NRF2)  | nuclear factor, erythroid 2-like 2                                  | 4780   |   |   |   | x |   |   |
| PGK1           | phosphoglycerate kinase 1                                           | 5230   |   |   | x | x |   |   |
| PPARA          | peroxisome proliferator-activated receptor alpha                    | 5465   |   | x |   |   |   |   |
| PPARG          | peroxisome proliferator-activated receptor gamma                    | 5468   |   | x |   | x |   |   |
| PRKAR1A        | protein kinase, cAMP-dependent, regulatory, type I, alpha           | 5573   |   |   |   | x |   |   |
| RBP4           | retinol binding protein 4, plasma                                   | 5950   | x |   | x | x |   |   |
| SLC2A1 (GLUT1) | solute carrier family 2 (facilitated glucose transporter), member 1 | 6513   | x | x |   | x |   |   |
| SLC2A4 (GLUT4) | solute carrier family 2 (facilitated glucose transporter), member 4 | 6517   |   | x |   |   |   |   |
| TF             | transferrin                                                         | 7018   |   |   | x | x | x |   |
| TNFA           | tumor necrosis factor                                               | 167910 |   | x |   |   | x |   |
| TSPAN8         | tetraspanin 8                                                       | 7103   | x |   |   | x |   |   |
