# Supplementary material for: Oleic Acid Uptake Reveals the Rescued Enterocyte Phenotype of Colon Cancer Caco-2 by HT29-MTX Cells in Co-Culture Mode
Source: MDPI journal article supplement (doi:10.3390/ijms18071573), 2017-07-20
Supplement: s1 [file s1]

Table S1: List of human genes specifically expressed in enterocytes versus colonocytes.

| Symbol        | Name                                                                                                 | GeneID  |
|---------------|------------------------------------------------------------------------------------------------------|---------|
| A20           | Tumor necrosis factor, alpha-induced protein 3 (TNFAIP3)                                             | 164371  |
| ANP           | Inhibin, beta A (INHBA)                                                                              | 1856335 |
| AREG          | amphiregulin                                                                                         | 374     |
| BDK           | bradykinin                                                                                           | 589     |
| bFGF          | Fibroblast growth factor 2 (basic) (FGF2)                                                            | 177026  |
| CCR1          | chemokine (C-C motif) receptor 1                                                                     | 1230    |
| CD11b (ITGAM) | Integrin, alpha M (complement component 3 receptor 3 subunit)                                        | 158221  |
| CD11c (CCR4)  | Chemokine (C-C motif) receptor 4 (CCR4)                                                              | 159632  |
| CD13 (ANPEP)  | Alanyl (membrane) aminopeptidase                                                                     | 130949  |
| CD14          | CD14 molecule (CD14)                                                                                 | 156684  |
| CD151         | CD151 molecule (Raph blood group)                                                                    | 977     |
| CD18          | Integrin, beta 2 (complement component 3 receptor 3 and 4 subunit) (ITGB2)                           | 201337  |
| CD21          | Complement component (3d/Epstein Barr virus) receptor 2                                              | 240794  |
| CD23          | Fc fragment of IgE, low affinity II, receptor for (CD23) (FCER2)                                     | 680937  |
| CD26          | dipeptidyl-peptidase 4                                                                               | 197782  |
| CD27          | CD27 molecule                                                                                        | 939     |
| CD28          | CD28 molecule                                                                                        | 940     |
| CD29          | Integrin, beta 1 (fibronectin receptor, beta polypeptide, antigen CD29 includes MDF2, MSK12) (ITGB1) | 2224984 |
| CD31 (PECAM1) | Platelet/endothelial cell adhesion molecule 1                                                        | 905159  |
| CD32 (FCGR2A) | Fc fragment of IgG, low affinity IIa, receptor (CD32)                                                | 194554  |
| CD35 (CR1)    | Complement component (3b/4b) receptor 1 (Knops blood group)                                          | 190181  |
| CD36          | CD36 molecule (thrombospondin receptor)                                                              | 948     |
| CD39 (ENTPD1) | Ectonucleoside triphosphate diphosphohydrolase 1                                                     | 1849599 |
| CD41a         | integrin subunit alpha 2b                                                                            | 3674    |
| CD43 (SPN)    | Sialophorin                                                                                          | 2139082 |
| CD44v6        | CD44 molecule (Indian blood group) (CD44)                                                            | 717487  |
| CD49a         | ITGA1 integrin subunit alpha 1                                                                       | 3672    |
| CD49b         | Integrin, alpha 2 (CD49B, alpha 2 subunit of VLA-2 receptor) (ITGA2)                                 | 697236  |
| CD49c         | Integrin, alpha 3 (antigen CD49C, alpha 3 subunit of VLA-3 receptor) (ITGA3)                         | 172175  |
| CD49f         | Integrin, alpha 6 (ITGA6)                                                                            | 149927  |
| CD59          | CD59 molecule, complement regulatory protein                                                         | 966     |
| CD61 (ITGB3)  | Integrin, beta 3 (platelet glycoprotein IIIa, antigen CD61)                                          | 165073  |

|        |                                                                                                         |         |
|--------|---------------------------------------------------------------------------------------------------------|---------|
| CD63   | CD63 molecule                                                                                           | 967     |
| CD64   | Fc fragment of IgG, high affinity Ia, receptor (CD64)                                                   | 140094  |
| CD66   | Carcinoembryonic antigen-related cell adhesion molecule 1 (biliary glycoprotein) (CEACAM1)              | 903429  |
| CD9    | CD9 molecule                                                                                            | 928     |
| CSF3   | colony stimulating factor 3 (granulocyte)                                                               | 1440    |
| DMBT1  | deleted in malignant brain tumors 1                                                                     | 1755    |
| EAAC1  | Solute carrier family 1 (neuronal/epithelial high affinity glutamate transporter, system Xag), member 1 | 239952  |
| FGF-15 | Fibroblast growth factor 19 (FGF19)                                                                     | 169252  |
| FIZZ-2 | Resistin like beta (RETNLB)                                                                             | 182689  |
| FPR1   | formyl peptide receptor 1                                                                               | 2357    |
| FPRL1  | Formyl peptide receptor 2 (FPR2)                                                                        | 142766  |
| FPRL2  | Formyl peptide receptor 3 (FPR3)                                                                        | 240503  |
| GITR   | Tumor necrosis factor (ligand) superfamily, member 18 (TNFSF18)                                         | 169086  |
| GRP    | gastrin-releasing peptide                                                                               | 2922    |
| HAI-1  | SPINT1 serine peptidase inhibitor, Kunitz type 1                                                        | 6692    |
| HAI-2  | SPINT2 serine peptidase inhibitor, Kunitz type 2                                                        | 10653   |
| hsp70  | Heat shock 70kDa protein 4                                                                              | 141344  |
| hsp90  | Heat shock protein 90kDa alpha (cytosolic), class B member 1 (HSP90AB1)                                 | 509736  |
| IDE    | insulin-degrading enzyme                                                                                | 3416    |
| IFRD1  | interferon-related developmental regulator 1                                                            | 3475    |
| IGFBP1 | insulin-like growth factor binding protein 1                                                            | 3484    |
| IL1RA  | Interleukin 1 receptor, type I (IL1R1)                                                                  | 3093867 |
| IL2    | interleukin 2                                                                                           | 3558    |
| IL7    | interleukin 7                                                                                           | 3574    |
| INHBA  | inhibin, beta A                                                                                         | 3624    |
| INSR   | insulin receptor                                                                                        | 3643    |
| IRAKM  | Interleukin-1 receptor-associated kinase 3 (IRAK3)                                                      | 197978  |
| LBP    | lipopolysaccharide binding protein                                                                      | 3929    |
| LCRF   | Diazepam binding inhibitor (GABA receptor modulator, acyl-CoA binding protein) (DBI)                    | 140274  |
| LGALS1 | lectin, galactoside-binding, soluble, 1                                                                 | 3956    |
| LGALS3 | lectin, galactoside-binding, soluble, 3                                                                 | 3958    |
| LTF    | lactotransferrin                                                                                        | 4057    |
| MEP1A  | meprin A, alpha (PABA peptide hydrolase)                                                                | 4224    |
| MEP1B  | meprin A, beta                                                                                          | 4225    |

|        |                                                                                                   |         |
|--------|---------------------------------------------------------------------------------------------------|---------|
| MMP-1  | Matrix metalloproteinase 1 (interstitial collagenase) (MMP1)                                      | 140712  |
| MMP-10 | Matrix metalloproteinase 10 (stromelysin 2) (MMP10)                                               | 131195  |
| MMP-19 | Matrix metalloproteinase 19 (MMP19)                                                               | 2060044 |
| MMP-26 | Matrix metalloproteinase 26 (MMP26)                                                               | 163051  |
| NEU    | V-erb-b2 erythroblastic leukemia viral oncogene homolog 2, neuro/glioblastoma derived oncogene ho | 241389  |
| NPW    | neuropeptide W                                                                                    | 283869  |
| PAWR   | PRKC, apoptosis, WT1, regulator                                                                   | 5074    |
| PTHR   | Parathyroid hormone-like hormone (PTH LH)                                                         | 2060170 |
| PYY    | peptide YY                                                                                        | 5697    |
| REG3G  | regenerating islet-derived 3 gamma                                                                | 130120  |
| S100G  | S100 calcium binding protein G                                                                    | 795     |
| S100P  | S100 calcium binding protein P                                                                    | 6286    |
| SIGIRR | single immunoglobulin and toll-interleukin 1 receptor (TIR) domain                                | 59307   |
| TIMP2  | TIMP metalloproteinase inhibitor 2                                                                | 7077    |
| TIMP3  | TIMP metalloproteinase inhibitor 3                                                                | 7078    |
| TLR2   | toll-like receptor 2                                                                              | 7097    |
| TLR9   | toll-like receptor 9                                                                              | 54106   |
| TOLLIP | toll interacting protein                                                                          | 54472   |
| TRAF6  | TNF receptor-associated factor 6, E3 ubiquitin protein ligase                                     | 7189    |
| VEGFA  | vascular endothelial growth factor A                                                              | 7422    |
