# Supplementary material for: Oleic Acid Uptake Reveals the Rescued Enterocyte Phenotype of Colon Cancer Caco-2 by HT29-MTX Cells in Co-Culture Mode
Source: MDPI journal article supplement (doi:10.3390/ijms18071573), 2017-07-20

|       |             | aFATCD36   | SEM        |      |             | aFABP4      | SEM         |
|-------|-------------|------------|------------|------|-------------|-------------|-------------|
| APC/H | HT29-MTX    | 0.00288371 | 0.00057624 | PE/H | HT29-MTX    | 0.111468319 | 0.000655618 |
|       | Caco-2      | 0.00222729 | 0.00041429 |      | Caco-2      | 0.069481626 | 0.001302511 |
|       | Co-culture  | 0          | 0.00028929 |      | Co-culture  | 0.058280562 | 0.000533889 |
|       | Co-culture° | 0.00229293 | 0.00043048 |      | Co-culture° | 0.073680295 | 0.001237822 |

**Figure S1:** Extracellular FAT/CD36 and FABP4 proteins are reduced in Caco-2 cells co-cultured with HT29-MTX cells (10%). Differentiated cells (D20) were labeled with either anti-Allophycocyanin (APC) anti-FAT/CD36 antibody (1 µg/mL, Biolegend, Ozyme, Montigny-le-Bretonneux, France) without cell permeabilization or anti-FABP4 antibody (2 µg/mL, Sigma Aldrich) detected with phycoerythrin (PE)-coupled secondary antibody after permeabilization in triton 0,1%. Fluorescence intensity and quantification were measured on Cytation 3 platform. Data are presented as mean fold changes (antibody fluorescence intensity / nuclei labeled with Hoechst 33258) +/- SEM on a representative experiment (n= 8 wells), stars represent significant Student t-test p-values p<0,05 between experimental *versus* theoretical(°) (90% Caco + 10% HT29) co-culture results.

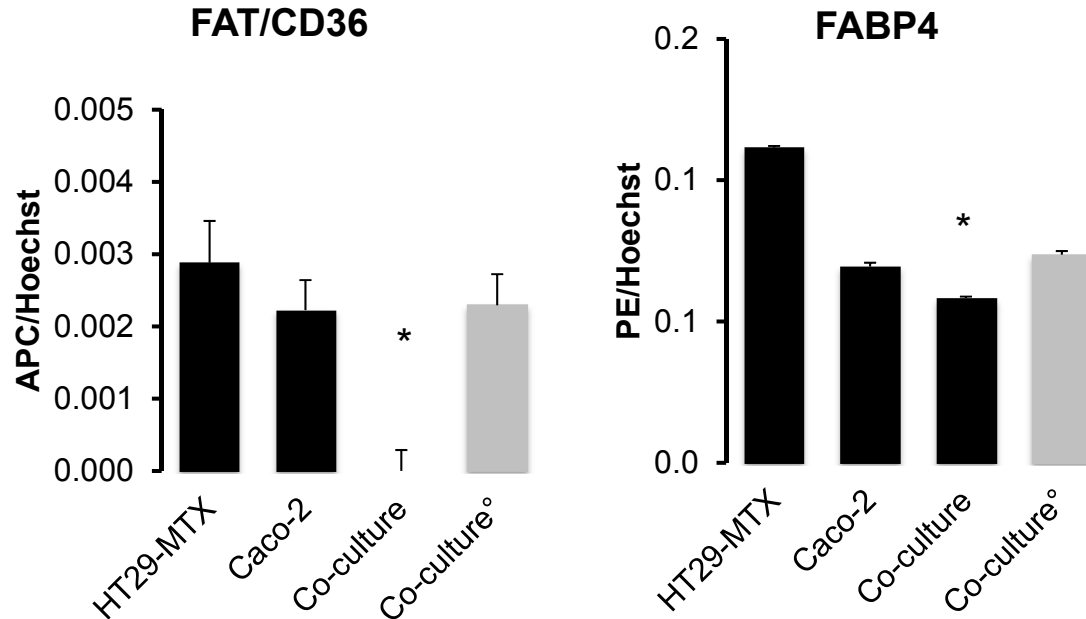

Supplement: s1 [file s1]
